# Supplementary material for: Virus-Induced Gene Silencing (VIGS): A Powerful Tool for Crop Improvement and Its Advancement towards Epigenetics
Source: MDPI journal article supplement (doi:10.3390/ijms24065608), 2023-03-15
Supplement: s1 [file s1]

**Table S1: VIGS Vectors, Plant Species, and Their Method of Transmission Used in Gene Silencing**

| Virus Vector                               | Silenced Host                                                                                                                                                                                                                                                                        | Group/Genus | Vector Transmission Method                                        | Gene Silenced                                                                                                                                                                                   | Nature of Genome                 | References                         |
|--------------------------------------------|--------------------------------------------------------------------------------------------------------------------------------------------------------------------------------------------------------------------------------------------------------------------------------------|-------------|-------------------------------------------------------------------|-------------------------------------------------------------------------------------------------------------------------------------------------------------------------------------------------|----------------------------------|------------------------------------|
| RNA Viruses                                |                                                                                                                                                                                                                                                                                      |             |                                                                   |                                                                                                                                                                                                 |                                  |                                    |
| <b>Tobacco mosaic virus</b>                | <i>Nicotiana benthamiana</i> , <i>Nicotiana tabacum</i>                                                                                                                                                                                                                              | Tobamovirus | Rub inoculation                                                   | <i>pds</i> , <i>psy</i> , <i>rbcS</i> , <i>chsA</i>                                                                                                                                             | Positive-strand RNA, monopartite | [1]; [2]; [3]                      |
| <b>Apple latent spherical virus (ALSV)</b> | <i>Nicotiana</i> spp., <i>Malus domestica</i> , <i>Pyrus communis</i> L, <i>Solanum lycopersicum</i> , <i>N. occidentalis</i> , <i>n. glutinosa</i> , <i>Cucumis</i> spp, cucurbit species, several legume species, pumpkin ( <i>Cucurbita maxima</i> ), <i>Arabidopsis thaliana</i> | Cheravirus  | sap inoculation, and particle bombardment                         | <i>pds</i> , <i>su</i> , <i>pcna</i> , <i>sulfur</i> gene                                                                                                                                       | Positive-strand RNA, bipartite   | [4]; [5]; [6]                      |
| <b>Brome mosaic virus</b>                  | <i>Oryza sativa</i> , <i>Hordeum vulgare</i> , <i>N. benthamiana</i> , <i>Sorghum bicolor</i> , <i>Zea mays</i> , <i>Triticum aestivum</i> L, <i>Festuca arundinacea</i>                                                                                                             | Bromovirus  | Rub inoculation, vacuum infiltration, and Agro infiltration       | <i>Ubiq</i> , <i>ChlH</i> , <i>PDS</i> <i>actin 1</i> , <i>rubisco</i> <i>activase</i> , <i>HSP70-1</i> , <i>PHYTOENE DESATURASE</i> ( <i>Ta PDS</i> ) and <i>PHOSPHATE 2</i> ( <i>TaPHO2</i> ) | Positive-strand RNA, tripartite  | [7]; [8]; [9]; [10]; [11]          |
| <b>Barley stripe mosaic virus</b>          | <i>Brachypodium distachyum</i> , <i>Hordeum vulgare</i> L, <i>Avena</i> species and <i>Triticum aestivum</i>                                                                                                                                                                         | Hordeivirus | Rub inoculation                                                   | <i>pds</i> , <i>Bx1</i> , <i>Ta_PYL4AS_A</i>                                                                                                                                                    | Positive-strand RNA, tripartite  | [12]; [13]; [14]; [15]; [16]; [16] |
| <b>Bean pod mottle virus</b>               | <i>Glycine max</i> , Kefeng 1 and <i>Phaseolus vulgaris</i> ,                                                                                                                                                                                                                        | Comovirus   | Rub inoculation, Mechanical inoculation, and particle bombardment | <i>Pds</i> , <i>GmCAL</i>                                                                                                                                                                       | Positive-strand RNA, bipartite   | [17]; [18]; [19]; [20]             |

Table S1

|                                            |                                                             |             |                                            |                                                                                                    |                                          |                  |
|--------------------------------------------|-------------------------------------------------------------|-------------|--------------------------------------------|----------------------------------------------------------------------------------------------------|------------------------------------------|------------------|
| <b>Cucumber mosaic virus</b>               | <i>Glycine max</i> , <i>Zea mays</i>                        | Cucumovirus | Sap inoculation,<br>Mechanical inoculation | <i>chs</i> , <i>sf3' h1</i> ,<br>isopentenyl/dimethylallyl diphosphate synthase ( <i>ZmIspsH</i> ) | Positive-strand RNA, tripartite          | [21]; [22]       |
| <b>Cymbidium mosaic virus (CymMV)</b>      | <i>Phalaenopsis orchids</i> ,<br><i>Phalaenopsis</i> flower | Potexvirus  | Rub inoculation,<br>Agro infiltration      | <i>PeMADS6</i> ,<br><i>PeUFGT3</i> , <i>PeMA DS5</i> and <i>PeMADS 6</i>                           | Positive Single-stranded (+ssRNA) genome | [23]; [24]       |
| <b>Potato Virus X (PVX)</b>                | <i>N.benthamiana</i> <i>Solanum tuberosum</i> ,             | Potexvirus  | Agro inoculation                           | <i>gus</i> , <i>pds</i> , <i>DWARF</i> , <i>SSU</i> , <i>NFL</i> , <i>LFY</i>                      | Positive-strand RNA, monopartite         | [25]; [26]; [27] |
| <b>Potato Virus A (PVA)</b>                | <i>N.benthamiana</i>                                        | Potyvirus   | Rub inoculation and particle bombardment   | Systemic <i>gfp</i> transgene silencing                                                            | Single-stranded, RNA viruses             | [28]             |
| <b>Watermelon mosaic virus (WMV)</b>       | <i>Cucumis melo</i>                                         | Potyvirus   | Agrobacterium-mediated gene transfer       | Melon Phytoene desaturase ( <i>PDS</i> )                                                           | Single-stranded, RNA viruses             | [29]             |
| <b>Zucchini yellow mosaic virus (ZYMV)</b> | <i>Cucurbita pepo</i>                                       | Potyvirus   | Agrobacterium-mediated gene transfer       | Bacterial phytoene synthase ( <i>crtB</i> )                                                        | Single-stranded, RNA viruses             | [29]             |
| <b>Pea early browning virus</b>            | <i>Lathyrus odorata</i> , <i>Medicago truncatula</i>        | Tobravirus  | Agro inoculation                           | <i>pds</i> , <i>uni</i> , <i>kor</i>                                                               | Positive-strand RNA, bipartite           | [30]             |
| <b>Poplar mosaic virus (PopMV)</b>         | <i>N.benthamiana</i>                                        | Carlavirus  | Agro inoculation                           | <i>gfp</i>                                                                                         | Positive-strand RNA, monopartite         | [31]             |
| <b>Plum pox virus (PPV)</b>                | <i>N.benthamiana</i>                                        | Potyvirus   | Agro inoculation                           | IBDV VP3 inhibits PKR-dependent apoptosis                                                          | +ssRNA                                   | [32]             |

|                                          |                                                                                                                                                                                                                                                                                                                                |             |                                     |                                                                                                                                    |                                  |                              |
|------------------------------------------|--------------------------------------------------------------------------------------------------------------------------------------------------------------------------------------------------------------------------------------------------------------------------------------------------------------------------------|-------------|-------------------------------------|------------------------------------------------------------------------------------------------------------------------------------|----------------------------------|------------------------------|
| <b>Sunn-hemp mosaic virus (SHMV)</b>     | <i>N.benthamiana</i> , <i>Medicago truncatula</i>                                                                                                                                                                                                                                                                              | Tobamovirus | Rub inoculation                     | <i>gfp</i> , <i>PDS</i> , <i>CH42</i>                                                                                              | Positive-strand RNA virus        | [33]                         |
| <b>Tobacco necrosis virus A (TNV-A)</b>  | <i>N.benthamiana</i>                                                                                                                                                                                                                                                                                                           | Necrovirus  | Agro inoculation                    | Non-putative gene                                                                                                                  | +ssRNA                           | [34]                         |
| <b>Tomato bushy stunt virus (TBSV)</b>   | <i>N.benthamiana</i>                                                                                                                                                                                                                                                                                                           | Tombusvirus | Rub inoculation                     | <i>RMJ3</i> , <i>T33</i>                                                                                                           | +ssRNA                           | [35]                         |
| <b>Tobacco rattle virus (TRV)</b>        | Opium or California poppy, <i>N. benthamiana</i> , <i>S. lycopersicum</i> , <i>Aquilegia vulgaris</i> , <i>A. thaliana</i> , <i>Capsicum</i> spp, <i>Petunia hybrid</i> , <i>Solanum</i> spp, <i>Gossypium</i> spp, <i>Thalictrum dioicum</i> , <i>Jatropha curcas</i> L, <i>Nicotiana attenuate</i> , <i>Centaurea cyanus</i> | Tobravirus  | Agro-inoculation, Agro-infiltration | <i>pds</i> , <i>rbcS</i> , <i>FLO/LFY (NFL)</i>                                                                                    | Positive-strand RNA, bipartite   | [36]; [37]; [38]; [39]; [40] |
| <b>Turnip yellow mosaic virus (TYMV)</b> | <i>Arabidopsis thaliana</i> , <i>Brassica rapa</i> , <i>brassica napus</i> , Radish ( <i>Raphanus sativus</i> L.)                                                                                                                                                                                                              | Tymovirus   | Rub inoculation, Gene Gun           | <i>lfy</i> , <i>pds</i> , <i>RsNHX1</i>                                                                                            | Positive-strand RNA, monopartite | [41]; [42]; [43]             |
| <b>Foxtail mosaic virus</b>              | <i>Hordeum vulgare</i> , <i>Triticum aestivum</i> and <i>Setaria italica</i> , <i>Zea mays</i>                                                                                                                                                                                                                                 | Potexvirus  | Agro-infiltration                   | Several different reporter gene and <i>pds</i> , <i>CLAI</i> , <i>IspH</i> , <i>midrib3</i> , <i>iojap</i> , <i>lesion mimic22</i> | +ssRNA, Monopartite              | [44]; [45]                   |
| <b>Chinese wheat mosaic virus</b>        | <i>N. benthamiana</i> and <i>Triticum aestivum</i>                                                                                                                                                                                                                                                                             | Furovirus   | Agroinfiltration                    | <i>PDS</i> , miRNAs (miR165/166 and miR3134a)                                                                                      | +ssRNA                           | [46]                         |
| <b>DNA Viruses</b>                       |                                                                                                                                                                                                                                                                                                                                |             |                                     |                                                                                                                                    |                                  |                              |
| <b>Abutilon mosaic virus (AbMV)</b>      | <i>N. benthamiana</i>                                                                                                                                                                                                                                                                                                          | Begomovirus | Agro inoculation                    | <i>cpHSC70</i>                                                                                                                     | Single-stranded (S S)            | [47]                         |

Table S1

|                                            |                                                                                                                         |             |                                                                                         |                                          |                                            |                  |
|--------------------------------------------|-------------------------------------------------------------------------------------------------------------------------|-------------|-----------------------------------------------------------------------------------------|------------------------------------------|--------------------------------------------|------------------|
|                                            |                                                                                                                         |             |                                                                                         |                                          | DNA,<br>Bipartite                          |                  |
| <b>African cassava mosaic virus (ACMV)</b> | <i>Manihot esculenta</i> and <i>N. benthamiana</i>                                                                      | Begomovirus | Particle bombardment                                                                    | <i>su, cyp79d2</i>                       | ssDNA bipartite                            | [48]             |
| <b>Cassava common mosaic virus (CsCMV)</b> | cassava varieties and <i>Nicotiana benthamiana</i>                                                                      | Potexvirus  | Agro inoculation                                                                        | <i>PDS</i> and <i>ChII</i>               | Single-stranded RNA, Monopartite           | [49]             |
| <b>Beet curly top virus (BCTV)</b>         | <i>Spinacea oleracea</i> and <i>S. lycopersicum</i>                                                                     | Geminivirus | Biolistic techniques, Agro infiltration                                                 | <i>rbcS</i> and <i>ChII</i> ,            | Circular, single-stranded ( <i>ss</i> )DNA | [50]             |
| <b>Cabbage leaf curl virus (CaLCuV)</b>    | <i>A. thaliana</i> , Brassica crop species ( <i>Brassica rapa</i> and <i>Brassica nigra</i> ) and <i>N. benthamiana</i> | Begomovirus | Particle bombardment, Agro inoculation, <i>Agrobacterium</i> syringe infiltration       | <i>gfp, CH42, pds</i>                    | ssDNA, bipartite                           | [51]; [52]; [53] |
| <b>Cotton leaf crumple virus (CLCrV)</b>   | <i>Gossypium</i> spp                                                                                                    | Begomovirus | Particle bombardment, Agro-inoculation, and <i>Agrobacterium</i> -mediated infiltration | <i>ChII, PDS, CHLI</i> and EF-1 $\alpha$ | ( <i>ss</i> )DNA, bipartite                | [54]; [55]       |
| <b>Grapevine virus A (GVA)</b>             | <i>N. benthamiana</i> and <i>Vitis vinifera</i>                                                                         | Vitivirus   | Agro inoculation                                                                        | <i>PDS</i>                               | Single-stranded RNA                        | [56]             |
| <b>Pepper Huasteco yellow vein</b>         | <i>Capsicum</i> spp                                                                                                     | Begomovirus | Particle bombardment                                                                    | <i>Comt, pAmt</i> and <i>Kas</i>         | Circular, ssDNA bipartite                  | [57]             |

|                                                                                                                                                                           |                                                             |                        |                                            |                                                           |                                              |            |
|---------------------------------------------------------------------------------------------------------------------------------------------------------------------------|-------------------------------------------------------------|------------------------|--------------------------------------------|-----------------------------------------------------------|----------------------------------------------|------------|
| <b>virus<br/>(PHYV)<br/>Rice tungro<br/>bacilliform<br/>virus<br/>(RTBV)<br/>Tomato<br/>golden<br/>mosaic virus<br/>(TGMV)<br/>Tomato leaf<br/>curl virus<br/>(ToLCV)</b> | <i>O. sativa, Cynodon<br/>dactylon and Zoysia japonica</i>  | Tungrovirus            | Agro-<br>inoculation,<br>Agro-infiltration | <i>Pds</i>                                                | Circular<br>double-<br>stranded<br>DNA       | [58]; [59] |
| <b>Tomato<br/>golden<br/>mosaic virus<br/>(TGMV)</b>                                                                                                                      | <i>N. benthamiana</i>                                       | Begomovirus            | Particle<br>bombardment                    | <i>su, luc</i>                                            | ssDNA,<br>bipartite                          | [60]       |
| <b>Tomato leaf<br/>curl virus<br/>(ToLCV)</b>                                                                                                                             | <i>N.benthamiana</i> and <i>S.<br/>lycopersicum</i>         | Begomovirus            | Agro inoculation                           | <i>PCNA</i>                                               | Circular,<br>ssDNA                           | [61]       |
| <b>RNA satellite virus</b>                                                                                                                                                |                                                             |                        |                                            |                                                           |                                              |            |
| <b>Satellite<br/>tobacco<br/>mosaic virus<br/>(STMV)<br/>Bamboo<br/>mosaic virus<br/>(BMV)</b>                                                                            | <i>N. tabacum</i>                                           | RNA satellite<br>Virus | Rub inoculation                            | <i>cesA-1a, cesA-2,<br/>als, chsA, rbcS,<br/>rbcL, tk</i> | Single<br>stranded<br>positive-<br>sense RNA | [62]       |
| <b>Bamboo<br/>mosaic virus<br/>(BMV)</b>                                                                                                                                  | <i>B. distachyon, N. benthamiana</i>                        | Potexvirus             | Rub inoculation<br>and<br>Agroinfiltration | <i>Sul</i> and <i>PDS</i>                                 | RNA<br>satellite<br>Virus                    | [63]       |
| <b>DNA satellite virus</b>                                                                                                                                                |                                                             |                        |                                            |                                                           |                                              |            |
| <b>Tomato<br/>yellow leaf<br/>curl china<br/>virus<br/>(TYLCCNV)<br/>Beta-satellite<br/>Bhendi<br/>yellow vein<br/>mosaic virus<br/>Beta-satellite</b>                    | <i>S.lycopersicu, Nicotina spp, and<br/>Petunia hybrida</i> | DNA beta<br>satellite  | Agro inoculation                           | <i>Pcna, pds, su,<br/>FRO1</i>                            | ssDNA,<br>satellite                          | [64]; [65] |
| <b>Beta-satellite<br/>Bhendi<br/>yellow vein<br/>mosaic virus<br/>Beta-satellite</b>                                                                                      | <i>N. benthamiana</i>                                       | DNA beta<br>satellite  | Inoculation with<br>needle-less<br>syringe | <i>Su, PDS, PCNA<br/>and AGO1</i>                         | ssDNA,<br>satellite                          | [66]       |

Table S1

|                                                         |                                                                           |             |                  |                                               |                                    |            |
|---------------------------------------------------------|---------------------------------------------------------------------------|-------------|------------------|-----------------------------------------------|------------------------------------|------------|
| <b>Tobacco curly shoot virus (TbCSV) Beta-satellite</b> | <i>N.benthamiana</i>                                                      | Begomovirus | Agro inoculation | <i>gfp, su, chs, pcna</i>                     | DNA, satellite                     | [67]; [68] |
| <b>TbCSV Alpha-satellite</b>                            | <i>S.lycopersicu-m</i> and <i>Nicotina spp</i> ,<br><i>Petunia hybrid</i> | Begomovirus | Agro inoculation | <i>β-glucuronidase (GUS) gene, Su, NtEDS1</i> | <i>Circular, ssDNA monopartite</i> | [68]; [69] |

## References

- [1] M.H. Kumagai, J. Donson, G. Della-Cioppa, D. Harvey, K. Hanley, L.J.P.o.t.N.A.o.S. Grill, Cytoplasmic inhibition of carotenoid biosynthesis with virus-derived RNA, 92(5) (1995) 1679-1683.
- [2] V. Gosselé, I. Faché, F. Meulewaeter, M. Cornelissen, M.J.T.P.J. Metzlaff, SVISS—a novel transient gene silencing system for gene function discovery and validation in tobacco plants, 32(5) (2002) 859-866.
- [3] J.-B. Hiriart, E.-M. Aro, K.J.M.p.-m.i. Lehto, Dynamics of the VIGS-mediated chimeric silencing of the *Nicotiana benthamiana* ChlH gene and of the tobacco mosaic virus vector, 16(2) (2003) 99-106.

- [4] A. Igarashi, K. Yamagata, T. Sugai, Y. Takahashi, E. Sugawara, A. Tamura, H. Yaegashi, N. Yamagishi, T. Takahashi, M.J.V. Isogai, Apple latent spherical virus vectors for reliable and effective virus-induced gene silencing among a broad range of plants including tobacco, tomato, *Arabidopsis thaliana*, cucurbits, and legumes, 386(2) (2009) 407-416.
- [5] N. Yamagishi, N.J.P.m.b. Yoshikawa, Virus-induced gene silencing in soybean seeds and the emergence stage of soybean plants with Apple latent spherical virus vectors, 71(1) (2009) 15-24.
- [6] N. Yamagishi, N.J.J.o.V.M. Yoshikawa, Efficient virus-induced gene silencing system in pumpkin (*Cucurbita maxima*) using apple latent spherical virus vector, 301 (2022) 114456.
- [7] X.S. Ding, W.L. Schneider, S.R. Chaluvadi, M.R. Mian, R.S.J.M.P.-M.I. Nelson, Characterization of a Brome mosaic virus strain and its use as a vector for gene silencing in monocotyledonous hosts, 19(11) (2006) 1229-1239.
- [8] S.R. Scofield, R.S.J.P.p. Nelson, Resources for virus-induced gene silencing in the grasses, 149(1) (2009) 152-157.
- [9] K. van der Linde, C. Kastner, J. Kumlehn, R. Kahmann, G.J.N.P. Doehlemann, Systemic virus-induced gene silencing allows functional characterization of maize genes during biotrophic interaction with *Ustilago maydis*, 189(2) (2011) 471-483.
- [10] X.S. Ding, S.W. Mannas, B.A. Bishop, X. Rao, M. Lecoultré, S. Kwon, R.S.J.P.P. Nelson, An improved brome mosaic virus silencing vector: greater insert stability and more extensive VIGS, 176(1) (2018) 496-510.
- [11] Y. Wang, C. Chai, B. Khatabi, W.-R. Scheible, M.K. Udvardi, M.C. Saha, Y. Kang, R.S.J.F.i.p.s. Nelson, An Efficient Brome mosaic virus-based gene silencing protocol for hexaploid wheat (*Triticum aestivum* L.), 12 (2021) 1036.
- [12] S. Holzberg, P. Brosio, C. Gross, G.P.J.T.P.J. Pogue, Barley stripe mosaic virus-induced gene silencing in a monocot plant, 30(3) (2002) 315-327. 13] M. Bruun-Rasmussen, C.T. Madsen, S. Jessing, M.J.M.P.-M.I. Albrechtsen, Stability of barley stripe mosaic virus-induced gene silencing in barley, 20(11) (2007) 1323-1331.
- [14] A. Pacak, K. Geisler, B. Jørgensen, M. Barciszewska-Pacak, L. Nilsson, T.H. Nielsen, E. Johansen, M. Grønlund, I. Jakobsen, M.J.P.m. Albrechtsen, Investigations of barley stripe mosaic virus as a gene silencing vector in barley roots and in *Brachypodium distachyon* and oat, 6(1) (2010) 1-16.
- [15] C. Yuan, C. Li, L. Yan, A.O. Jackson, Z. Liu, C. Han, J. Yu, D. Li, A high throughput barley stripe mosaic virus vector for virus induced gene silencing in monocots and dicots, PLoS One 6(10) (2011) e26468.
- [16] C.S. Gordon, N. Rajagopalan, E.P. Risseuw, M. Surpin, F.J. Ball, C.J. Barber, L.M. Buhrow, S.M. Clark, J.E. Page, C.D.J.P.O. Todd, Characterization of *Triticum aestivum* abscisic acid receptors and a possible role for these in mediating Fusarium head blight susceptibility in wheat, 11(10) (2016) e0164996.
- [17] C. Zhang, S.A.J.V. Ghabrial, Development of Bean pod mottle virus-based vectors for stable protein expression and sequence-specific virus-induced gene silencing in soybean, 344(2) (2006) 401-411.
- [18] C. Zhang, C. Yang, S.A. Whitham, J.H.J.M.p.-m.i. Hill, Development and use of an efficient DNA-based viral gene silencing vector for soybean, 22(2) (2009) 123-131.

Table S1

- [19] C. Zhang, J.D. Bradshaw, S.A. Whitham, J.H.J.P.p. Hill, The development of an efficient multipurpose bean pod mottle virus viral vector set for foreign gene expression and RNA silencing, 153(1) (2010) 52-65.
- [20] Q. Ren, H. Jiang, W. Xiang, Y. Nie, S. Xue, H. Zhi, K. Li, J.J.T.C.J. Gai, A MADS-box gene is involved in soybean resistance to multiple soybean mosaic virus strains, 10(3) (2022) 802-808.
- [21] A. Nagamatsu, C. Masuta, M. Senda, H. Matsuura, A. Kasai, J.S. Hong, K. Kitamura, J. Abe, A.J.P.b.j. Kanazawa, Functional analysis of soybean genes involved in flavonoid biosynthesis by virus-induced gene silencing, 5(6) (2007) 778-790.
- [22] H. Li, D. Zhang, K. Xie, Y. Wang, Q. Liao, Y. Hong, Y.J.P.P. Liu, Efficient and high-throughput pseudorecombinant-chimeric Cucumber mosaic virus-based VIGS in maize, 187(4) (2021) 2865-2876.
- [23] H.-C. Lu, H.-H. Chen, W.-C. Tsai, W.-H. Chen, H.-J. Su, D.C.-N. Chang, H.-H.J.P.P. Yeh, Strategies for functional validation of genes involved in reproductive stages of orchids, 143(2) (2007) 558-569.
- [24] M.-H. Hsieh, H.-C. Lu, Z.-J. Pan, H.-H. Yeh, S.-S. Wang, W.-H. Chen, H.-H.J.P.S. Chen, Optimizing virus-induced gene silencing efficiency with Cymbidium mosaic virus in Phalaenopsis flower, 201 (2013) 25-41.
- [25] M.T. Ruiz, O. Voinnet, D.C.J.T.P.C. Baulcombe, Initiation and maintenance of virus-induced gene silencing, 10(6) (1998) 937-946.
- [26] C. Burger, S. Rondet, P. Benveniste, H.J.J.o.e.b. Schaller, Virus-induced silencing of sterol biosynthetic genes: identification of a *Nicotiana tabacum* L. obtusifoliol-14 $\alpha$ -demethylase (CYP51) by genetic manipulation of the sterol biosynthetic pathway in *Nicotiana benthamiana* L, 54(388) (2003) 1675-1683.
- [27] O. Faivre-Rampant, E.M. Gilroy, K. Hrubikova, I. Hein, S. Millam, G.J. Loake, P. Birch, M. Taylor, C.J.P.P. Lacomme, Potato virus X-induced gene silencing in leaves and tubers of potato, 134(4) (2004) 1308-1316.
- [28] E. Gammelgård, M. Mohan, J.P.J.J.o.g.v. Valkonen, Potyvirus-induced gene silencing: the dynamic process of systemic silencing and silencing suppression, 88(8) (2007) 2337-2346.
- [29] F. Houhou, Biotechnological application of potyvirus-based vectors in cucurbit plants, Universitat Politècnica de València, 2021.
- [30] M. Grønlund, G. Constantin, E. Piednoir, J. Kovacev, I.E. Johansen, O.S.J.V.R. Lund, Virus-induced gene silencing in *Medicago truncatula* and *Lathyrus odorata*, 135(2) (2008) 345-349.
- [31] M. Naylor, J. Reeves, J. Cooper, M.-L. Edwards, H.J.J.o.v.m. Wang, Construction and properties of a gene-silencing vector based on Poplar mosaic virus (genus Carlavirus), 124(1-2) (2005) 27-36.
- [32] F.E. Vaistij, L.J.P.p. Jones, Compromised virus-induced gene silencing in RDR6-deficient plants, 149(3) (2009) 1399-1407.
- [33] É. Várallyay, Z. Lichner, J. Sáfrány, Z. Havelda, P. Salamon, G. Bisztray, J.J.A.B.H. Burgyán, Development of a virus induced gene silencing vector from a legumes infecting tobamovirus, 61(4) (2010) 457-469.



- [34] Y. Gao, Y.-L. Zhang, X.-F. Zhang, C.-G. Han, J.-L. Yu, D.-W. Li, Development and optimization of Tobacco necrosis virus A induced gene silencing in *Nicotiana benthamiana*, *Progress in Biochemistry and Biophysics* 38(10) (2011) 919-928.
- [35] D. Pignatta, P. Kumar, M. Turina, A. Dandekar, B.W. Falk, Quantitative analysis of efficient endogenous gene silencing in *Nicotiana benthamiana* plants using tomato bushy stunt virus vectors that retain the capsid protein gene, *Molecular plant-microbe interactions* 20(6) (2007) 609-618.
- [36] F. Ratcliff, A.M. Martin-Hernandez, D.C. Baulcombe, Technical advance: tobacco rattle virus as a vector for analysis of gene function by silencing, *The Plant Journal* 25(2) (2001) 237-245.
- [37] Y. Liu, M. Schiff, R. Marathe, S. Dinesh-Kumar, Tobacco Rar1, EDS1 and NPR1/NIM1 like genes are required for N-mediated resistance to tobacco mosaic virus, *The Plant Journal* 30(4) (2002) 415-429.
- [38] V.S. Di Stilio, Empowering plant evo-devo: Virus induced gene silencing validates new and emerging model systems, *BioEssays* 33(9) (2011) 711-718.
- [39] C. Deng, F. Zhang, J. Wang, Y. Li, H. Huang, S. Dai, Tobacco Rattle Virus-induced Phytoene Desaturase (PDS) Silencing in *Centaurea cyanus*, *Horticultural Plant Journal* 7(2) (2021) 159-166.
- [40] J. Rahman, I.T. Baldwin, K. Gase, California TRV-based VIGS vectors mediate gene silencing at elevated temperatures but with greater growth stunting, *BMC plant biology* 21(1) (2021) 1-17.
- [41] S. Pflieger, S. Blanchet, L. Camborde, G. Drugeon, A. Rousseau, M. Noizet, S. Planchais, I. Jupin, Efficient virus-induced gene silencing in *Arabidopsis* using a 'one-step' TYMV-derived vector, *The Plant Journal* 56(4) (2008) 678-690.
- [42] J. Yu, X.-D. Yang, Q. Wang, L.-W. Gao, Y. Yang, D. Xiao, T.-K. Liu, Y. Li, X.-L. Hou, C.-W. Zhang, Efficient virus-induced gene silencing in *Brassica rapa* using a turnip yellow mosaic virus vector, *Biologia plantarum* 62(4) (2018) 826-834.
- [43] Y. Wang, J. Ying, Y. Zhang, L. Xu, W. Zhang, M. Ni, Y. Zhu, L. Liu, Genome-wide identification and functional characterization of the cation proton antiporter (CPA) family related to salt stress response in radish (*Raphanus sativus* L.), *International journal of molecular sciences* 21(21) (2020) 8262.
- [44] N. Liu, K. Xie, Q. Jia, J. Zhao, T. Chen, H. Li, X. Wei, X. Diao, Y. Hong, Y. Liu, Foxtail mosaic virus-induced gene silencing in monocot plants, *Plant physiology* 171(3) (2016) 1801-1807.
- [45] Y. Mei, C. Zhang, B.M. Kernodle, J.H. Hill, S.A. Whitham, A Foxtail mosaic virus vector for virus-induced gene silencing in maize, *Plant Physiology* 171(2) (2016) 760-772.
- [46] J. Yang, T.-Y. Zhang, Q.-S. Liao, L. He, J. Li, H.-M. Zhang, X. Chen, J. Li, J. Yang, J.-B. Li, Chinese wheat mosaic virus-induced gene silencing in monocots and dicots at low temperature, *Frontiers in plant science* 9 (2018) 1627.
- [47] B. Krenz, C. Wege, H. Jeske, Cell-free construction of disarmed Abutilon mosaic virus-based gene silencing vectors, *Journal of virological methods* 169(1) (2010) 129-137.

Table S1

- [48] I.B. Fofana, A. Sangaré, R. Collier, C. Taylor, C.M. Fauquet, A geminivirus-induced gene silencing system for gene function validation in cassava, *Plant molecular biology* 56(4) (2004) 613-624.
- [49] D. Tuo, P. Zhou, P. Yan, H. Cui, Y. Liu, H. Wang, X. Yang, W. Liao, D. Sun, X. Li, A cassava common mosaic virus vector for virus-induced gene silencing in cassava, *Plant Methods* 17(1) (2021) 1-12.
- [50] E.M. Golenberg, D. Sather, L.C. Hancock, K.J. Buckley, N.M. Villafranco, D.M. Bisaro, Development of a gene silencing DNA vector derived from a broad host range geminivirus, *Plant Methods* 5(1) (2009) 1-14.
- [51] M.A. Turnage, N. Muangsan, C.G. Peele, D. Robertson, Geminivirus-based vectors for gene silencing in Arabidopsis, *The Plant Journal* 30(1) (2002) 107-114.
- [52] C. Huang, Y. Qian, Z. Li, X. Zhou, Virus-induced gene silencing and its application in plant functional genomics, *Science China Life Sciences* 55(2) (2012) 99-108.
- [53] Z. Xiao, M. Xing, X. Liu, Z. Fang, L. Yang, Y. Zhang, Y. Wang, M. Zhuang, H. Lv, An efficient virus-induced gene silencing (VIGS) system for functional genomics in Brassicas using a cabbage leaf curl virus (CaLCuV)-based vector, *Planta* 252(3) (2020) 1-12.
- [54] J.R. Tuttle, A. Idris, J.K. Brown, C.H. Haigler, D. Robertson, Geminivirus-mediated gene silencing from Cotton leaf crumple virus is enhanced by low temperature in cotton, *Plant Physiology* 148(1) (2008) 41-50.
- [55] Z. Gu, C. Huang, F. Li, X. Zhou, A versatile system for functional analysis of genes and micro RNA s in cotton, *Plant biotechnology journal* 12(5) (2014) 638-649.
- [56] M. Muruganantham, Y. Moskovitz, S. Haviv, T. Horesh, A. Fenigstein, J. du Preez, D. Stephan, J.T. Burger, M. Mawassi, Grapevine virus A-mediated gene silencing in Nicotiana benthamiana and Vitis vinifera, *Journal of virological methods* 155(2) (2009) 167-174.
- [57] M. del Rosario Abraham-Juárez, M. del Carmen Rocha-Granados, M.G. López, R.F. Rivera-Bustamante, N. Ochoa-Alejo, Virus-induced silencing of Comt, pAmt and Kas genes results in a reduction of capsaicinoid accumulation in chili pepper fruits, *Planta* 227(3) (2008) 681-695.
- [58] A. Purkayastha, S. Mathur, V. Verma, S. Sharma, I. Dasgupta, Virus-induced gene silencing in rice using a vector derived from a DNA virus, *Planta* 232(6) (2010) 1531-1540.
- [59] B. Zhang, J.-A. Shi, J.-B. Chen, D.-D. Li, J.-J. Li, H.-L. Guo, J.-Q. Zong, Y. Wang, A.-G. Guo, J.-X. Liu, Efficient virus-induced gene silencing in Cynodon dactylon and Zoysia japonica using rice tungro bacilliform virus vectors, *Scientia Horticulturae* 207 (2016) 97-103.
- [60] J. Carrillo-Tripp, H. Shimada-Beltrán, R. Rivera-Bustamante, Use of geminiviral vectors for functional genomics, *Current opinion in plant biology* 9(2) (2006) 209-215.
- [61] P. Pandey, N.R. Choudhury, S.K. Mukherjee, A geminiviral amplicon (VA) derived from Tomato leaf curl virus (ToLCV) can replicate in a wide variety of plant species and also acts as a VIGS vector, *Virology Journal* 6(1) (2009) 1-13.

- [62] V. Gosselé, I. Faché, F. Meulewaeter, M. Cornelissen, M. Metzlaff, SVISS—a novel transient gene silencing system for gene function discovery and validation in tobacco plants, *The Plant Journal* 32(5) (2002) 859-866.
- [63] M.R. Liou, Y.W. Huang, C.C. Hu, N.S. Lin, Y.H. Hsu, A dual gene-silencing vector system for monocot and dicot plants, *Plant Biotechnology Journal* 12(3) (2014) 330-343.
- [64] X. Tao, X. Zhou, A modified viral satellite DNA that suppresses gene expression in plants, *The Plant Journal* 38(5) (2004) 850-860.
- [65] X. He, C. Jin, G. Li, G. You, X. Zhou, S. Zheng, Use of the modified viral satellite DNA vector to silence mineral nutrition-related genes in plants: silencing of the tomato ferric chelate reductase gene, *FRO1*, as an example, *Science in China Series C: Life Sciences* 51(5) (2008) 402-409.
- [66] C. Jeyabharathy, H. Shakila, R. Usha, Development of a VIGS vector based on the  $\beta$ -satellite DNA associated with bhendi yellow vein mosaic virus, *Virus research* 195 (2015) 73-78.
- [67] Y. Qian, R.B. Mugiira, X. Zhou, A modified viral satellite DNA-based gene silencing vector is effective in association with heterologous begomoviruses, *Virus research* 118(1-2) (2006) 136-142.
- [68] C. Huang, Y. Xie, X. Zhou, Efficient virus-induced gene silencing in plants using a modified geminivirus DNA1 component, *Plant biotechnology journal* 7(3) (2009) 254-265.
- [69] C.-j. Huang, T. Zhang, F.-f. Li, X.-y. Zhang, X.-p. Zhou, Development and application of an efficient virus-induced gene silencing system in *Nicotiana tabacum* using geminivirus alphasatellite, *Journal of Zhejiang University Science B* 12(2) (2011) 83-92.
